# Supplementary material for: Mamo decodes hierarchical temporal gradients into terminal neuronal fate
Source: eLife. 2019 Sep 23;8:e48056. doi: 10.7554/eLife.48056 (PMC6764822; doi:10.7554/eLife.48056)
Supplement: Figure 1—source data 1. [file elife-48056-fig1-data1.xlsx]

## Sheet: Figure 1-Source Data 1
72h ALH	Intensity	72h ALH	72h ALH-Background	72h ALH-Chinmo AU		72h ALH	Intensity	72h ALH	72h ALH-Background	72h ALH-Mamo AU
	Chinmo	13.04	3.23	9.81			Mamo	3.06	2.7	0.36
	Chinmo	12.4	3.37	9.03			Mamo	3.23	2.41	0.82
	Chinmo	10.06	1.89	8.17			Mamo	2.06	1.48	0.58
	Chinmo	10.51	2.11	8.4			Mamo	2.37	2	0.37
	Chinmo	8.68	1.9	6.78			Mamo	3.16	2.53	0.63
	Chinmo	9.13	2.15	6.98			Mamo	2.76	2.28	0.48
Sum				49.17		Sum				3.24
Ave				8.195		Ave				0.54
SEM				0.477024		SEM				0.0714143
84h ALH	Intensity	84h ALH	84h ALH-background	84h ALH-Chinmo AU		84h ALH	Intensity	84h ALH	84h ALH-background	84h ALH-Mamo AU
	Chinmo	4.08	1.49	2.59			Mamo	25.5	5.93	19.57
	Chinmo	3.74	0.92	2.82			Mamo	13.66	1	12.66
	Chinmo	5.44	2.34	3.1			Mamo	15.08	1.3	13.78
	Chinmo	6.35	3.02	3.33			Mamo	17.56	3.21	14.35
	Chinmo	5.38	1.87	3.51			Mamo	19.75	4.85	14.9
	Chinmo	6.26	3.02	3.24			Mamo	16.04	4.14	11.9
Sum				18.59		Sum				87.16
Ave				3.09833		Ave				14.5267
SEM				0.138934		SEM				1.10374
24h APF	Intensity	24h ALH	24h ALH-background	24h APF-Chinmo AU		24h APF	Intensity	24h ALH	24h ALH-background	24h APF-Mamo AU
	Chinmo	5.37	5.03	0.34			Mamo	5.74	4.04	1.7
	Chinmo	6.92	4.77	2.15			Mamo	5.44	5.01	0.43
	Chinmo	4.19	2.04	2.15			Mamo	3.54	2.36	1.18
	Chinmo	4.57	4.35	0.22			Mamo	3.47	3.06	0.41
	Chinmo	2.05	1.99	0.06			Mamo	3.98	2.61	1.37
	Chinmo	1.02	0.97	0.05			Mamo	2.22	1.18	1.04
Sum				4.97		Sum				6.13
Ave				0.828333		Ave				1.02167
SEM				0.420249		SEM				0.210641
