# Supplementary material for: Mamo decodes hierarchical temporal gradients into terminal neuronal fate
Source: eLife. 2019 Sep 23;8:e48056. doi: 10.7554/eLife.48056 (PMC6764822; doi:10.7554/eLife.48056)
Supplement: Figure 2—source data 1. [file elife-48056-fig2-data1.xlsx]

## Sheet: Sheet1
	Mamo-positive neurons / per brain hemispere
		Control	chinmo-RNAi		Control	chinmo-RNAi
Raw data	60ALH	0	53	84ALH	114	326
Raw data	60ALH	0	45	84ALH	106	248
Raw data	60ALH	0	72	84ALH	96	311
Raw data	60ALH	0	100	84ALH	123	293
Raw data	60ALH	-	89	84ALH	-	260
Mean	60ALH	0	71.8	84ALH	109.75	287.6
Standard error of the mean (SEM)	60ALH	0	11.6265	84ALH	6.63953	16.5477
p Value student t test	60ALH	0.00230785	-	84ALH	8.31164e-05	-
