# Supplementary material for: Mamo decodes hierarchical temporal gradients into terminal neuronal fate
Source: eLife. 2019 Sep 23;8:e48056. doi: 10.7554/eLife.48056 (PMC6764822; doi:10.7554/eLife.48056)
Supplement: Figure 2—source data 2. [file elife-48056-fig2-data2.xlsx]

## Sheet: Sheet1
Control						OK107>chinmo-GOF						chinmo-/-; OK107>GFP						OK107>chinmo-RNAi
84h ALH	Intensity	84h ALH	84h ALH-background	84h ALH-Mamo AU		84h ALH	Intensity	84h ALH	84h ALH-background	84h ALH-Mamo AU		84h ALH	Intensity	84h ALH	84h ALH-background	84h ALH-Mamo AU		84h ALH	Intensity	84h ALH	84h ALH-background	84h ALH-Mamo AU
	Mamo	18.63	4.74	13.89			Mamo	1.82	1.56	0.26			Mamo	4.89	3.13	1.76			Mamo	26.61	3.19	23.42
	Mamo	21.52	4.77	16.75			Mamo	3.07	1.22	1.85			Mamo	2.62	2.11	0.51			Mamo	23.1	4.29	18.81
	Mamo	23	4.59	18.41			Mamo	2.44	1.71	0.73			Mamo	2.9	2.59	0.31			Mamo	23.25	3.55	19.7
	Mamo	15.73	4.24	11.49			Mamo	1.39	1.18	0.21			Mamo	3.94	3.58	0.36			Mamo	24.97	4.64	20.33
	Mamo	16.48	4.01	12.47			Mamo	1.8	1.06	0.74			Mamo	5.45	3.62	1.83			Mamo	23.16	4.74	18.42
Sum				73.01			Mamo	1.68	1.48	0.2			Mamo	4.37	3.34	1.03			Mamo	18.78	4.1	14.68
Ave				14.602		Sum				3.99		Sum				5.8		Sum				115.36
SEM				1.30099		Ave				0.665		Ave				0.966667		Ave				19.2267
						SEM				0.258286		SEM				0.282048		SEM				1.16221
Control						OK107>chinmo-RNAi
60h ALH	Intensity	60h ALH	60h ALH-background	60h ALH-Mamo AU		60h ALH	Intensity	60h ALH	60h ALH-background	60h ALH-Mamo AU
	Mamo	5.4	4.51	0.89			Mamo	21.57	4.45	17.12
	Mamo	4.53	3.63	0.9			Mamo	17.92	5.18	12.74
	Mamo	3.74	2.13	1.61			Mamo	20.59	4.01	16.58
	Mamo	4.16	2.23	1.93			Mamo	19.75	3.9	15.85
	Mamo	3.72	3.29	0.43			Mamo	17.39	2.69	14.7
	Mamo	5.09	4	1.09			Mamo	24.03	5.33	18.7
Sum				6.85			Mamo	18.42	4.2	14.22
Ave				1.14167		Sum				109.91
SEM				0.221486		Ave				15.7014
						SEM				0.752223
