# Supplementary material for: Mamo decodes hierarchical temporal gradients into terminal neuronal fate
Source: eLife. 2019 Sep 23;8:e48056. doi: 10.7554/eLife.48056 (PMC6764822; doi:10.7554/eLife.48056)
Supplement: Figure 3—source data 1. [file elife-48056-fig3-data1.xlsx]

## Sheet: Sheet1
Control						OK107>Syp-RNAi						OK107>Syp-GOF						OK107>Syp-RNAi+chinmo-RNAi
84h ALH	Intensity	84h ALH	84h ALH-background	84h ALH-Mamo AU		84h ALH	Intensity	84h ALH	84h ALH-background	84h ALH-Mamo AU		84h ALH	Intensity	84h ALH	84h ALH-background	84h ALH-Mamo AU		84h ALH	Intensity	84h ALH	84h ALH-background	84h ALH-Mamo AU
	Mamo	19.43	4.76	14.67			Mamo	6.65	4.68	1.97			Mamo	20.25	4.21	16.04			Mamo	6.59	5.15	1.44
	Mamo	16.79	3.59	13.2			Mamo	7.28	6.53	0.75			Mamo	20.07	4.8	15.27			Mamo	6.27	4.67	1.6
	Mamo	18.16	3.77	14.39			Mamo	3.96	2.99	0.97			Mamo	18.09	4	14.09			Mamo	6.76	5.25	1.51
	Mamo	17.44	4.54	12.9			Mamo	4.43	4.07	0.36			Mamo	21.64	5.66	15.98			Mamo	6.17	4.31	1.86
	Mamo	21.02	4.83	16.19			Mamo	3.92	3.82	0.1			Mamo	18.05	5.09	12.96			Mamo	6.3	4.1	2.2
Sum				71.35			Mamo	3.2	2.7	0.5			Mamo	20.09	4.85	15.24			Mamo	6.03	5.16	0.87
Ave				14.27		Sum				4.65		Sum				89.58		Sum				9.48
SEM				0.586626		Ave				0.775		Ave				14.93		Ave				1.58
						SEM				0.268958		SEM				0.487606		SEM				0.181824
