# Supplementary material for: Mamo decodes hierarchical temporal gradients into terminal neuronal fate
Source: eLife. 2019 Sep 23;8:e48056. doi: 10.7554/eLife.48056 (PMC6764822; doi:10.7554/eLife.48056)
Supplement: Figure 3—source data 2. [file elife-48056-fig3-data2.xlsx]

## Sheet: Sheet1
Control						OK107>chinmo-RNAi						OK107>Syp-RNAi+chinmo-RNAi
48h ALH	Intensity	48h ALH	48h ALH-background	48h ALH-Chinmo AU		48h ALH	Intensity	48h ALH	48h ALH-background	48h ALH-Chinmo AU		48h ALH	Intensity	48h ALH	48h ALH-background	48h ALH-Chinmo AU
	Chinmo	29.35	1.44	27.91			Chinmo	6.51	2.5	4.01			Chinmo	4.91	2.94	1.97
	Chinmo	33.29	3.45	29.84			Chinmo	6.22	1.78	4.44			Chinmo	5.09	1.88	3.21
	Chinmo	30.83	2.68	28.15			Chinmo	10.89	4.16	6.73			Chinmo	4.89	2.15	2.74
	Chinmo	30.17	4.36	25.81			Chinmo	4.25	2.05	2.2			Chinmo	7.34	3.43	3.91
	Chinmo	41.17	6.66	34.51			Chinmo	5.08	2.39	2.69			Chinmo	4.13	2.93	1.2
	Chinmo	29.73	3.72	26.01			Chinmo	4.83	2.06	2.77			Chinmo	4.55	2.48	2.07
Sum				172.23		Sum				22.84		Sum				15.1
Ave				28.705		Ave				3.80667		Ave				2.51667
SEM				1.31111		SEM				0.680474		SEM				0.395977
Control						OK107>Syp-RNAi						OK107>Syp-GOF
72h ALH	Intensity	72h ALH	72h ALH-Background	72h ALH-Chinmo AU		72h ALH	Intensity	72h ALH	72h ALH-Background	72h ALH-Chinmo AU		72h ALH	Intensity	72h ALH	72h ALH-Background	72h ALH-Chinmo AU
	Chinmo	17.52	0.45	17.07			Chinmo	40.16	2.23	37.93			Chinmo	1.54	0.56	0.98
	Chinmo	20.01	1.79	18.22			Chinmo	38.79	1.8	36.99			Chinmo	1.87	1.09	0.78
	Chinmo	20.89	1.72	19.17			Chinmo	40.28	3.19	37.09			Chinmo	3.72	1.18	2.54
	Chinmo	19.87	1.39	18.48			Chinmo	37.15	1.42	35.73			Chinmo	3.5	2.09	1.41
	Chinmo	18.55	2.57	15.98			Chinmo	36.66	2.52	34.14			Chinmo	3.5	1.65	1.85
	Chinmo	21.66	2.68	18.98			Chinmo	33.55	0.98	32.57			Chinmo	3.7	1.13	2.57
Sum				107.9		Sum				214.45		Sum				10.13
Ave				17.9833		Ave				35.7417		Ave				1.68833
SEM				0.501721		SEM				0.832468		SEM				0.312681
