# Supplementary material for: Mamo decodes hierarchical temporal gradients into terminal neuronal fate
Source: eLife. 2019 Sep 23;8:e48056. doi: 10.7554/eLife.48056 (PMC6764822; doi:10.7554/eLife.48056)
Supplement: Figure 4—source data 1. [file elife-48056-fig4-data1.xlsx]

## Sheet: Sheet1
Control						Control						Control
48h ALH	Intensity	48h ALH	48h ALH-background	48h ALH-Mamo AU		72h ALH	Intensity	72h ALH	72h ALH-background	72h ALH-Mamo AU		84h ALH	Intensity	84h ALH	84h ALH-background	84h ALH-Mamo AU
	Mamo	3.78	3.72	0.06			Mamo	3.2	2.82	0.38			Mamo	20.65	0.88	19.77
	Mamo	3.66	3.21	0.45			Mamo	3.99	2.86	1.13			Mamo	16.98	0.49	16.49
	Mamo	3.94	3.91	0.03			Mamo	3.04	2.59	0.45			Mamo	20.32	4.27	16.05
	Mamo	4.79	4.03	0.76			Mamo	3.98	3.77	0.21			Mamo	16.2	4.29	11.91
	Mamo	4.89	4.23	0.66			Mamo	4.98	4.42	0.56			Mamo	14.62	0.92	13.7
	Mamo	5.17	5.04	0.13			Mamo	3.2	2.79	0.41			Mamo	10.64	0.69	9.95
Sum				2.09		Sum				3.14		Sum				87.87
Ave				0.348333		Ave				0.523333		Ave				14.645
SEM				0.130267		SEM				0.129915		SEM				1.43829
OK107>chinmo-RNAi						OK107>chinmo-RNAi						OK107>chinmo-RNAi
48h ALH	Intensity	48h ALH	48h ALH-background	48h ALH-Mamo AU		72h ALH	Intensity	72h ALH	72h ALH-background	72h ALH-Mamo AU		84h ALH	Intensity	84h ALH	84h ALH-background	84h ALH-Mamo AU
	Mamo	9.7	4.4	5.3			Mamo	13.75	2.19	11.56			Mamo	11.53	4.86	6.67
	Mamo	9.67	5.68	3.99			Mamo	12.47	2.92	9.55			Mamo	23.4	3.75	19.65
	Mamo	11.9	6.18	5.72			Mamo	16.33	3.77	12.56			Mamo	14.86	3.32	11.54
	Mamo	9.87	5.42	4.45			Mamo	14.19	4.17	10.02			Mamo	14.01	3.86	10.15
	Mamo	8.19	4.08	4.11			Mamo	14.24	3.64	10.6			Mamo	16.46	3.96	12.5
	Mamo	9.71	5.88	3.83			Mamo	19.18	8.09	11.09			Mamo	16.13	5.48	10.65
Sum				27.4		Sum				65.38		Sum				71.16
Ave				4.56667		Ave				10.8967		Ave				11.86
SEM				0.314395		SEM				0.444002		SEM				1.75614
OK107>chinmo-RNAi+Syp-RNAi						OK107>chinmo-RNAi+Syp-RNAi						OK107>chinmo-RNAi+Syp-RNAi
48h ALH	Intensity	48h ALH	48h ALH-background	48h ALH-Mamo AU		72h ALH	Intensity	72h ALH	72h ALH-background	72h ALH-Mamo AU		84h ALH	Intensity	84h ALH	84h ALH-background	84h ALH-Mamo AU
	Mamo	4.36	4.13	0.23			Mamo	3.13	2.52	0.61			Mamo	7.52	6.04	1.48
	Mamo	3.26	2.94	0.32			Mamo	3.51	2.58	0.93			Mamo	5.5	4.51	0.99
	Mamo	5.38	4.57	0.81			Mamo	3.82	2.71	1.11			Mamo	6.14	4.53	1.61
	Mamo	5.65	5.61	0.04			Mamo	4.65	2.99	1.66			Mamo	4.98	4.8	0.18
	Mamo	6.21	4.54	1.67			Mamo	3.77	2.78	0.99			Mamo	7.01	5.01	2
	Mamo	3.36	3.12	0.24			Mamo	4.47	3.55	0.92			Mamo	6.65	4.81	1.84
Sum				3.31		Sum				6.22		Sum				8.1
Ave				0.551667		Ave				1.03667		Ave				1.35
SEM				0.247217		SEM				0.14179		SEM				0.273593
						OK107>mamo-RNAi						OK107>mamo-RNAi
						72h ALH	Intensity	72h ALH	72h ALH-background	72h ALH-Mamo AU		84h ALH	Intensity	84h ALH	84h ALH-background	84h ALH-Mamo AU
							Mamo	0.4	0.28	0.12			Mamo	6.66	4.56	2.1
							Mamo	0.66	0.52	0.14			Mamo	6.45	6.36	0.09
							Mamo	1.04	0.61	0.43			Mamo	6.41	4.47	1.94
							Mamo	0.94	0.82	0.12			Mamo	1.73	0.55	1.18
						Sum				0.81			Mamo	1.29	0.42	0.87
						Ave				0.2025			Mamo	0.7	0.32	0.38
						SEM				0.0759797		Sum				6.56
												Ave				1.09333
												SEM				0.33182
