# Supplementary material for: Mamo decodes hierarchical temporal gradients into terminal neuronal fate
Source: eLife. 2019 Sep 23;8:e48056. doi: 10.7554/eLife.48056 (PMC6764822; doi:10.7554/eLife.48056)
Supplement: Figure 4—source data 2. [file elife-48056-fig4-data2.xlsx]

## Sheet: Sheet1
	5' to 3'			5' to 3'
mamo_exon	caacttcagattctccttgg		mamo_intron	tagcacttcgtgttcgattt
mamo_exon	cagaagaggcacacgaacgg		mamo_intron	ggccaaaattcatccaaacc
mamo_exon	caggtgcttcgatagatagt		mamo_intron	ctcacttcacacttttgcta
mamo_exon	ggctttgttatatcctgtat		mamo_intron	tttgtccaacactttccatt
mamo_exon	ctaatcgtagagcttctggt		mamo_intron	atgtatacgtctgggtgttt
mamo_exon	tttgtttttctctagcttgc		mamo_intron	atttttccaaaagcgcatcc
mamo_exon	aacactttaatacccgtgct		mamo_intron	attttttgccagttgttgtg
mamo_exon	tcgtaaaccttactccacac		mamo_intron	cgctggcgacttctaaaact
mamo_exon	tcgttaccatctgcacttaa		mamo_intron	gccggaagttcgagaatttt
mamo_exon	tgtctcacagaaccaagtcg		mamo_intron	gttaaggtcttgtgttgtgg
mamo_exon	tgtggctgtttcgttaatgt		mamo_intron	agaagctagacagtgcgttt
mamo_exon	tattgcagtgtcgtctgatg		mamo_intron	cgagagacagcgatgggaat
mamo_exon	tgcggtacttcatttgtttc		mamo_intron	tatccacacaaaggcaacgc
mamo_exon	attgttgctagttagcttct		mamo_intron	aggcacttaaaacacccgag
mamo_exon	cggcttttgtttgttttgta		mamo_intron	ccaacaatgttgcaccttat
mamo_exon	aagttagtttcctctcgttt		mamo_intron	acttaagcatttgggctcag
mamo_exon	ctcagttattgcattgatcc		mamo_intron	tggttgctcaagccacaaaa
mamo_exon	tctgtggtaggtaacagagt		mamo_intron	gcacattaaccgccattaat
mamo_exon	aatcccatatcgcttattgt		mamo_intron	gtttgtgacgattttttgcc
mamo_exon	gcacttgcatcgttgaaaca		mamo_intron	ggcactagcaaaaaaggcca
mamo_exon	gcctccatactgaacatatg		mamo_intron	catgtttttttatggcgctt
mamo_exon	attcgtatctcctagcttta		mamo_intron	atcggtttggggaatgactg
mamo_exon	gttcttctcttgttgtgatc		mamo_intron	ctagacaacggcaagccaag
mamo_exon	cctgtttagcttgtttgtag		mamo_intron	gccgtctggattatattgat
mamo_exon	atggttgccatcgctataaa		mamo_intron	aaccgcaaagttgcttcttg
mamo_exon	gtccaatttctctattgctt		mamo_intron	ccctttttttttccaaacga
mamo_exon	aattgcacatttcgtttcca		mamo_intron	tctcaccaacctatttttca
mamo_exon	tttgggctttctctagttta		mamo_intron	gcaggacaagggttaagagt
mamo_exon	acgcatttgagtttttcgga		mamo_intron	cccgacatagaagaagctga
mamo_exon	ctccttattgcgttagacat		mamo_intron	aaaatcaggggccaacatgc
mamo_exon	ttttggtacggcaattctca		mamo_intron	cctgttctaaccgtttaagt
mamo_exon	tggttagttgcttctcttta		mamo_intron	gcttctttcgtgtcgaaaca
mamo_exon	tacgctttgacaattcctgt		mamo_intron	tctgcacttgccacattaaa
mamo_exon	tagttaacgcttcgctttca		mamo_intron	acacttgacacttggcaact
mamo_exon	actaactattttctagccct		mamo_intron	gagaagatggatgcaggtct
mamo_exon	tttggatggtagatctccac		mamo_intron	gctggcttaaaagcttgagt
mamo_exon	aatcgaaaatcggggatccc		mamo_intron	caactgcatagaccacgaga
mamo_exon	cagaactgtgttgctggaga		mamo_intron	cataattgatctgtgggggg
mamo_exon	ctcaaggtgtgcggttaatt		mamo_intron	tttggtggctgtcaatagtg
mamo_exon	gtgatttgttgtcttttcgc		mamo_intron	agagatggactgagacgcac
mamo_exon	ctgatctttgacggttcaca		mamo_intron	gcgcgcatttcactttataa
mamo_exon	tttcggcatttgtgatgtga		mamo_intron	gttgttgttggcgcttaaat
mamo_exon	tgcccgagatggttaaacaa		mamo_intron	cccatattcttcatattcgt
mamo_exon	ggatggtttcatatcgacgg		mamo_intron	aaaacttctcgccggagatt
mamo_exon	ccactattcttaccttagtt		mamo_intron	agatgtgaagaggggtcttc
mamo_exon	tgacacaatttgttttgccc		mamo_intron	ggatgaaagggaattggggc
mamo_exon	ctttcctttttttttgggtt		mamo_intron	attccaattccttgaggttt
mamo_exon	gctttactggtttctttagt		mamo_intron	cactccttgataagctcttt
mamo_exon	gcacacgcacacctaagaaa		mamo_intron	aaacgcacctcgcttagaac
mamo_exon	ccagtactcgctattcaatt		mamo_intron	aggagtcgatgttttttcgg
mamo_exon	caattttttttctccttccg		mamo_intron	tatattttggcctcatccaa
mamo_exon	gtcttaaatccctccaattt		mamo_intron	ccaaaatcgtctcgaagggt
mamo_exon	tgcctacgtggtaaatttgt		mamo_intron	gcgtctgtttgttgttttta
mamo_exon	ttttcctgcatgttgtcaat		mamo_intron	atgcgctcacatatctcaac
mamo_exon	gaattttcgcatcgctttcg		mamo_intron	cacacacatgcatatgacca
mamo_exon	ttttttctatccatttccgt		mamo_intron	cgacagggtcaggtgtataa
mamo_exon	ggggtttttaggttttgttt		mamo_intron	gtttgtctgactacgcttta
mamo_exon	ttgtttggttgagttgcttc		mamo_intron	cgtgtgtatgtgtgtttgtg
mamo_exon	gtacgtgtgggagtggaata		mamo_intron	tccttggccatcattataat
mamo_exon	aatatccctattttgggtgt		mamo_intron	cttgagcgaagatcgtcgat
mamo_exon	atgcatttcgcgaaatccat		mamo_intron	cacttcttcagaggcaatgg
mamo_exon	taaagcttgcggtaggactt		mamo_intron	ttttagttccctcgaacttt
mamo_exon	tattatgcttctgctatcca		mamo_intron	tgctatcgatggttttggta
mamo_exon	tttgagggacttttgtctgg		mamo_intron	gctgggtggtcaactttaaa
mamo_exon	gagcttaggtgagagagact		mamo_intron	gactttttcccattttttgg
mamo_exon	acattttccattgtttccat		mamo_intron	cattcgcatttgcgacttac
mamo_exon	gtagacaccgaatctcttgt		mamo_intron	agggggctatgcaattttta
mamo_exon	atgttttccttagttgcatc		mamo_intron	gcataagtgttcgatgcacg
mamo_exon	tgccattcaatcgcttaaca		mamo_intron	gcaataagctttttttcgcc
mamo_exon	taagtatttcctcccatttg		mamo_intron	cgttatacgccttctttttt
mamo_exon	atttaggttttcctttgcac		mamo_intron	tataattcgcagacctaccg
mamo_exon	tttcttcgttcgttcgagag		mamo_intron	ttactttctgcatttgctgg
mamo_exon	tctattttatgtgggcttgc		mamo_intron	gttgccaactcacgaatttc
mamo_exon	ggtggtgagaatgtcgatga		mamo_intron	acattaaggggggtcttttt
mamo_exon	gttgttgttgggtttgatga		mamo_intron	ctcttttttgggtgagtgta
mamo_exon	gagatttcgcatctgaacca		mamo_intron	accatcaacctttgtcattt
mamo_exon	cgtccttgcagactggaaaa		mamo_intron	tccaaagtctggaatgcagt
mamo_exon	aggcacctaaaactatgcgt		mamo_intron	gaggggtcaatcagatttcg
mamo_exon	ctgtgcactcgaagaactca		mamo_intron	tgcgttcatgaaagtgggtg
mamo_exon	cgcacccatattttcatatt		mamo_intron	aacttgatgtgttgcctgag
mamo_exon	gtctcgaattggttccatta		mamo_intron	agacagactgtgctcttttt
mamo_exon	cttctaagtcccatctgtaa		mamo_intron	ttaccttctttttcgggatg
mamo_exon	acaactctgtgcgaatgcac		mamo_intron	ttacaaaccatggggcattc
mamo_exon	attgcgcttcggattttatc		mamo_intron	gctacacgagcgaaacacga
mamo_exon	cctaccatacagttggagaa		mamo_intron	tgtttaacccttttttgcac
mamo_exon	tgttcgtagcaccttcataa		mamo_intron	tacatttcgtcctgtttcat
mamo_exon	gtctcgattttctgtgtcaa		mamo_intron	caggacggtcaaaaggaggg
mamo_exon	ttttttgcttttctttccga		mamo_intron	aaatgtgaagtggcggttgc
mamo_exon	acaccgagagtttgctcaaa		mamo_intron	cactttaggccattcaactt
mamo_exon	tagtgtaatgtggctttgca		mamo_intron	cggcaagaagaagaggcgac
mamo_exon	tttggtttacgtctgtttgc		mamo_intron	ttgcagtcaaccccgaaaaa
mamo_exon	ttttgtcgccttagtttttt		mamo_intron	tcacaacgcacaggagcaag
mamo_exon	ttttccatttatgtcctgtt		mamo_intron	gtcccaaaaaacagcagacc
mamo_exon	gcattgcatttcgtagtttt		mamo_intron	tcgagtttgtgtgcagcaaa
mamo_exon	tatttgtttatcgtttccct		mamo_intron	caacccgattatatcctttc
mamo_exon	gcttgttttagttctcagtt		mamo_intron	taaactaccgcctgcaagag
