# Supplementary material for: Mamo decodes hierarchical temporal gradients into terminal neuronal fate
Source: eLife. 2019 Sep 23;8:e48056. doi: 10.7554/eLife.48056 (PMC6764822; doi:10.7554/eLife.48056)
Supplement: Figure 5—source data 1. [file elife-48056-fig5-data1.xlsx]

## Sheet: Sheet1
Control	g neurons	a'/b' neurons	a/b neurons		chinmo-RNAi	g neurons	a'/b' neurons	a/b neurons		mamo-GOF	g neurons	a'/b' neurons	a/b neurons
	0.384761	0.196361	0.418878			0.160847	0.20664	0.632513			0.617522	0.352803	0.029675
	0.383819	0.199003	0.417178			0.181022	0.20365	0.615328			0.662849	0.322211	0.0149402
	0.375	0.222744	0.402256			0.218514	0.125945	0.655542			0.688287	0.289314	0.0223985
Sum	1.14358	0.618108	1.23831		Sum	0.560383	0.536234	1.90338		Sum	1.96866	0.964328	0.0670137
Average %	0.381193	0.206036	0.41277		Average %	0.186794	0.178745	0.634461		Average %	0.656219	0.321443	0.0223379
SEM	0.00310862	0.00838888	0.00528028		SEM	0.0168953	0.0264142	0.0116493		SEM	0.0206953	0.0183316	0.00425366
﻿Student’s t-test						0.000347598	0.380502	6.50263e-05				0.00460915	5.44677e-07
