# Supplementary material for: Mamo decodes hierarchical temporal gradients into terminal neuronal fate
Source: eLife. 2019 Sep 23;8:e48056. doi: 10.7554/eLife.48056 (PMC6764822; doi:10.7554/eLife.48056)
Supplement: Figure 5—source data 2. [file elife-48056-fig5-data2.xlsx]

## Sheet: Sheet1
84h ALH	Chinmo Intensity	Background	Chinmo AU		84h ALH	Imp Intensity	Background	Imp AU	Syp Intensity	Background	Syp AU
Control	7.87	3.51	4.36		Control	32.4	8.43	23.97	40.48	21.15	19.33
Control	13.26	5.21	8.05		Control	27.81	8.43	19.38	41.11	21.15	19.96
Control	12.87	5.58	7.29		Control	26.28	10.71	15.57	56.17	30.59	25.58
Control	13.85	6.35	7.5		Control	27.01	7.85	19.16	45.37	19.79	25.58
Control	14.47	7.55	6.92		Control	35.44	8.02	27.42	57.06	24.78	32.28
Control	14.75	6.13	8.62		Control	20.2	6.91	13.29	52.14	26.39	25.75
Sum			42.74		Control	34.75	6.23	28.52	59.72	23.53	36.19
Ave			7.12333		Sum			147.31			184.67
SEM			0.604035		Ave			21.0443			26.3814
					SEM			2.19042			2.30755
84h ALH	Chinmo Intensity	Background	Chinmo AU		84h ALH	Imp Intensity	Background	Imp AU	Syp Intensity	Background	Syp AU
mamo-GOF	6.01	2.31	3.7		mamo-GOF	38.63	13.2	25.43	34.66	15.67	18.99
mamo-GOF	7.45	2.31	5.14		mamo-GOF	35.02	13.2	21.82	38.31	15.67	22.64
mamo-GOF	11.03	4.21	6.82		mamo-GOF	37.63	7.9	29.73	79.17	40.52	38.65
mamo-GOF	13.84	5.37	8.47		mamo-GOF	32.16	10.76	21.4	59.65	27.07	32.58
mamo-GOF	13.54	5.28	8.26		mamo-GOF	28.25	7.11	21.14	70.64	38.44	32.2
Sum			32.39		Sum			119.52			145.06
Ave			6.478		Ave			23.904			29.012
SEM			0.915644		SEM			1.65112			3.58349
﻿Student’s t-test			0.574419					0.321848			0.556165
