# Supplementary material for: Mamo decodes hierarchical temporal gradients into terminal neuronal fate
Source: eLife. 2019 Sep 23;8:e48056. doi: 10.7554/eLife.48056 (PMC6764822; doi:10.7554/eLife.48056)
Supplement: Figure 6—source data 1. [file elife-48056-fig6-data1.xlsx]

## Sheet: Sheet1
Control	Trio+PM,Cyto	Trio+PM		mamo-RNAi	Trio+PM,Cyto	Trio+PM		mamo-GOF	Trio+PM,Cyto	Trio+PM
	0.196882	0			0	0.165138			0.3387	0
	0.252053	0			0	0.215891			0.439201	0
	0.211987	0			0	0.146341			0.478731	0
Sum	0.660922	0		Sum	0	0.52737		Sum	1.25663	0
Average %	0.220307			Average %		0.17579		Average %	0.418877
SEM	0.0164609			SEM		0.0207716		SEM	0.0416811
Student’s t-test									0.0114131
